# Supplementary material for: Variation in menopausal vasomotor symptoms outcomes in clinical trials: a systematic review
Source: PubMed Central journal article supplement (PMC6972542; doi:10.1111/1471-0528.15990), 2019-11-13
Supplement: BJO-127-320-s001.pdf [file BJO-127-320-s001.pdf]

**Table S1.** Study characteristics and quality assessment scoring of the included studies

| Author                       | Year | Title                                                                                                                                | Journal                                      | Country   | Population                  | Participants | Follow-up duration | Intervention        | Jadad Score (max 5) | MOMENT Score (max 6) |
|------------------------------|------|--------------------------------------------------------------------------------------------------------------------------------------|----------------------------------------------|-----------|-----------------------------|--------------|--------------------|---------------------|---------------------|----------------------|
| Aghamiri, V.                 | 2016 | The effect of Hop ( <i>Humulus lupulus</i> L.) on early menopausal symptoms and HF: A randomized placebo-controlled trial            | Complementary Therapies in Clinical Practice | Iran      | pre and postmenopausal      | 120          | 12 wks             | dietary supplements | 5                   | 2                    |
| Aguirre, W                   | 2010 | Gabapentin vs. low-dose transdermal estradiol for treating post-menopausal women with moderate to very severe HF                     | Gynecological Endocrinology                  | Ecuador   | postmenopausal              | 45           | 8 wks              | Antiepileptics      | 2                   | 2                    |
| Al-Akoum, M.                 | 2009 | Effects of <i>Hypericum perforatum</i> (St. John's wort) on HF and quality of life in perimenopausal women: a randomized pilot trial | Menopause                                    | Canada    | perimenopausal              | 47           | 12 wks             | dietary supplements | 4                   | 4                    |
| Al-Azzawi, F. and H. Buckler | 2003 | Comparison of a novel vaginal ring delivering estradiol acetate versus oral estradiol for relief of vasomotor menopausal symptoms    | Climacteric                                  | UK        | postmenopausal and surgical | 159          | 24 wks             | HRT vaginal ring    | 5                   | 4                    |
| Allameh, Z.                  | 2013 | Comparison of Gabapentin with Estrogen for treatment of HF in post-menopausal women.                                                 | Journal of Research in Pharmacy Practice     | Iran      | postmenopausal              | 100          | 12 wks             | Antiepileptics      | 1                   | 3                    |
| Anderson, D. J.              | 2015 | Facilitating lifestyle changes to manage menopausal symptoms in women with breast cancer: a randomized                               | Menopause                                    | Australia | breast cancer               | 55           | 12 wks             | education           | 3                   | 6                    |

|                       |      |                                                                                                                                                                      |                                               |     |                             |     |        |                     |   |   |
|-----------------------|------|----------------------------------------------------------------------------------------------------------------------------------------------------------------------|-----------------------------------------------|-----|-----------------------------|-----|--------|---------------------|---|---|
| Andrikoula, M.        | 2011 | controlled pilot trial of The Pink Women's Wellness Program. The effects of micronutrient supplementation on vasomotor symptoms in postmenopausal women. C           | Climacteric                                   | UK  | postmenopausal              | 91  | 14 wks | dietary supplements | 5 | 2 |
| Archer, D. F., et al. | 2003 | Percutaneous 17beta-estradiol gel for the treatment of vasomotor symptoms in postmenopausal women. C                                                                 | Menopause                                     | USA | postmenopausal              | 221 | 12 wks | transdermal HRT     | 4 | 2 |
| Archer, D. F., et al. | 2009 | Desvenlafaxine for the treatment of vasomotor symptoms associated with menopause: a double-blind, randomized, placebo-controlled trial of efficacy and safety.       | American Journal of Obstetrics and Gynecology | USA | postmenopausal              | 567 | 26 wks | SSRI                | 4 | 2 |
| Archer, D., et al.    | 2009 | A double-blind, randomly assigned, placebo-controlled study of desvenlafaxine efficacy and safety for the treatment of vasomotor symptoms associated with menopause. | American Journal of Obstetrics and Gynecology | USA | postmenopausal and surgical | 458 | 12 wks | SSRI                | 5 | 6 |
| Archer, D., et al.    | 2014 | A randomized, double-blind, placebo-controlled study of the lowest effective dose of drospirenone with 17β-estradiol for moderate to severe vasomotor symptoms in    | Menopause                                     | USA | postmenopausal and surgical | 735 | 12 wks | oral HRT            | 5 | 6 |

|                   |      |                                                                                                                                                            |                           |         |                         |     |        |                     |   |   |
|-------------------|------|------------------------------------------------------------------------------------------------------------------------------------------------------------|---------------------------|---------|-------------------------|-----|--------|---------------------|---|---|
| Asghari, M.       | 2017 | postmenopausal women.<br>Effect of aerobic exercise and nutrition education on quality of life and early menopause symptoms: A randomized controlled trial | Women & Health            | Iran    | pre and postmenopausal  | 54  | 12 wks | exercise            | 3 | 2 |
| Aslan, E., et al. | 2007 | How best is to discontinue postmenopausal hormone therapy: immediate or tapered?                                                                           | Maturitas                 | Turkey  | postmenopausal          | 70  | 4 wks  | oral HRT            | 2 | 4 |
| Aso, T.           | 2012 | A natural S-equol supplement alleviates HF and other menopausal symptoms in equol nonproducing postmenopausal Japanese women                               | Journal of Women's Health | Japan   | postmenopausal          | 160 | 12 wks | S-equol             | 5 | 2 |
| Auerbach, L.      | 2012 | Pomegranate seed oil in women with menopausal symptoms: a prospective randomized, placebo-controlled, double-blinded trial                                 | Menopause                 | Austria | postmenopausal          | 80  | 12 wks | dietary supplements | 3 | 2 |
| Avis, N., et al.  | 2016 | Acupuncture in Menopause (AIM) study: a pragmatic, randomized controlled trial.                                                                            | Menopause                 | USA     | peri and postmenopausal | 209 | 12 mos | acupuncture         | 2 | 6 |
| Ayers, B.         | 2012 | Effectiveness of group and self-help cognitive behavior therapy in reducing problematic menopausal HF and NS (MENOS 2): A                                  | Menopause                 | USA     | peri and postmenopausal | 140 | 26 wks | cognitive therapy   | 3 | 6 |

|                      |      |                                                                                                                                                                                                                    |                              |       |                             |     |        |                     |   |   |
|----------------------|------|--------------------------------------------------------------------------------------------------------------------------------------------------------------------------------------------------------------------|------------------------------|-------|-----------------------------|-----|--------|---------------------|---|---|
| Bacchi-Modena, A     | 1997 | randomized controlled trial<br>Efficacy and tolerability of (R)Estraderm MX, a new estradiol matrix patch                                                                                                          | Maturitas                    | Italy | postmenopausal and surgical | 177 | 12 wks | transdermal HRT     | 3 | 6 |
| Bachmann, G., et al. | 2007 | Lowest effective transdermal 17beta-estradiol dose for relief of HF in postmenopausal women: a randomized controlled trial.                                                                                        | Obstetrics and Gynecology    | USA   | postmenopausal and surgical | 425 | 12 wks | transdermal HRT     | 5 | 6 |
| Bachmann, G., et al. | 2011 | Effects of bazedoxifene in nonflushing postmenopausal women: a randomized phase 2 trial.                                                                                                                           | Menopause                    | USA   | postmenopausal              | 494 | 12 wks | SSRI                | 5 | 6 |
| Bai, W.              | 2007 | Efficacy and tolerability of a medicinal product containing an isopropanolic black cohosh extract in Chinese women with menopausal symptoms: a randomized, double blind, parallel-controlled study versus tibolone | Maturitas                    | China | postmenopausal              | 244 | 12 wks | dietary supplements | 4 | 6 |
| Barton, D. L.        | 2010 | Phase III, placebo-controlled trial of three doses of citalopram for the treatment of HF: NCCTG trial N05C9                                                                                                        | Journal of Clinical Oncology | USA   | breast cancer               | 254 | 6 wks  | SSRI                | 1 | 6 |
| Benster, B., et al   | 2009 | A double-blind placebo-controlled study to evaluate the effect of progestelle progesterone cream on postmenopausal women                                                                                           | Menopause International      | UK    | postmenopausal and surgical | 230 | 6 mos  | transdermal HRT     | 4 | 6 |

|                      |      |                                                                                                                                                  |                           |                                                                        |                             |     |        |                 |   |   |
|----------------------|------|--------------------------------------------------------------------------------------------------------------------------------------------------|---------------------------|------------------------------------------------------------------------|-----------------------------|-----|--------|-----------------|---|---|
| Bertelli, G          | 2002 | Intramuscular depot medroxyprogesterone versus oral megestrol for the control of postmenopausal HF in breast cancer patients: a randomized study | Annals of Oncology        | Italy                                                                  | breast cancer               | 71  | 6 wks  | oral HRT        | 2 | 4 |
| Biglia, N., et al.   | 2009 | Non-hormonal treatment of HF in breast cancer survivors: gabapentin vs. vitamin E                                                                | Climacteric               | Italy                                                                  | breast cancer               | 115 | 12 wks | Antiepileptics  | 3 | 1 |
| Bokmand, S.          | 2003 | Acupuncture relieves menopausal discomfort in breast cancer patients: a prospective, double blinded, randomized study                            | Breast                    | Finland                                                                | breast cancer               | 94  | 12 wks | acupuncture     | 3 | 2 |
| Borud, E., et al.    | 2009 | The Acupuncture on HF Among Menopausal Women (ACUFLASH) study, a randomized controlled study                                                     | Menopause                 | Norway                                                                 | postmenopausal              | 276 | 12 wks | acupuncture     | 2 | 6 |
| Bouchard, P., et al. | 2012 | Randomized placebo- and active-controlled study of desvenlafaxine for menopausal vasomotor symptoms.                                             | Climacteric               | 35 sites in Europe, two sites in South Africa, and one site in Mexico. | postmenopausal              | 485 | 12 wks | SSRI            | 3 | 6 |
| Burke, G., et al     | 2003 | Soy protein and isoflavone effects on vasomotor symptoms in peri- and postmenopausal women: the Soy Estrogen Alternative Study.                  | Menopause                 | USA                                                                    | peri and postmenopausal     | 241 | 12 wks | isoflavone      | 3 | 4 |
| Buster, J., et al.   | 2008 | Low-dose estradiol spray to treat vasomotor symptoms:                                                                                            | Obstetrics and Gynecology | USA, 43 sites                                                          | postmenopausal and surgical | 454 | 12 wks | transdermal HRT | 4 | 4 |

|                                  |      |                                                                                                                                                                                |                                                |                                           |                                  |     |        |                      |   |   |
|----------------------------------|------|--------------------------------------------------------------------------------------------------------------------------------------------------------------------------------|------------------------------------------------|-------------------------------------------|----------------------------------|-----|--------|----------------------|---|---|
| Butt, D., et al.                 | 2008 | a randomized controlled trial.<br>Gabapentin for the treatment of menopausal HF: a randomized controlled trial.                                                                | Menopause                                      | Canada, greater Toronto area              | postmenopausal                   | 197 | 4 wks  | Antiepileptics       | 4 | 2 |
| Carmignani, L. O.                | 2010 | The effect of dietary soy supplementation compared to estrogen and placebo on menopausal symptoms: a randomized controlled trial                                               | Maturitas                                      | Brazil                                    | postmenopausal                   | 60  | 16 wks | isoflavone           | 5 | 2 |
| Carmody, J. F.                   | 2011 | Mindfulness training for coping with HF: results of a randomized trial                                                                                                         | Menopause                                      | USA                                       | peri and postmenopausal          | 110 | 20 wks | mindfulness training | 3 | 6 |
| Carpenter, J. S                  | 2012 | Effect of escitalopram on HF interference: a randomized, controlled trial.                                                                                                     | Fertility & Sterility                          | USA                                       | postmenopausal and surgical      | 205 | 4 wks  | SSRI                 | 5 | 6 |
| Carpenter, J., et al.            | 2013 | Paced respiration for vasomotor and other menopausal symptoms: a randomized, controlled trial.                                                                                 | Journal of General Internal Medicine           | USA, Midwestern city and surrounding area | breast cancer and postmenopausal | 218 | 16 wks | respiration          | 2 | 6 |
| Cezarino, P. Y                   | 2011 | The effects of cinnarizine on menopausal symptoms in women                                                                                                                     | Climacteric                                    | Brazil                                    | postmenopausal                   | 100 | 6 mos  | cinnarizin           | 5 | 1 |
| Chandeying, V. and M. Sangthawan | 2007 | Efficacy comparison of Pueraria mirifica (PM) against conjugated equine estrogen (CEE) with/without medroxyprogesterone acetate (MPA) in the treatment of climacteric symptoms | Journal of the Medical Association of Thailand | Thailand                                  | perimenopausal                   | 71  | 6 mos  | dietary supplements  | 1 | 6 |

|                   |      |                                                                                                                                                                                    |                                                                    |               |                                      |     |        |                       |   |   |
|-------------------|------|------------------------------------------------------------------------------------------------------------------------------------------------------------------------------------|--------------------------------------------------------------------|---------------|--------------------------------------|-----|--------|-----------------------|---|---|
| Chang, A., et al. | 2012 | in perimenopausal women: phase III study<br>The effect of herbal extract (EstroG-100) on pre-, peri- and postmenopausal women: a randomized double-blind, placebo-controlled study | Phytotherapy research : PTR                                        | Korea         | pre-peri-postmenopausal              | 64  | 12 wks | oral HRT              | 5 | 3 |
| Chenoy, R.        | 1994 | Effect of oral gamolenic acid from evening primrose oil on menopausal flushing                                                                                                     | BMJ                                                                | UK            | postmenopausal                       | 56  | 6 mos  | gamolenic acid        | 2 | 2 |
| Chien, L., et al. | 2011 | Local thermal therapy effects on menopausal symptoms and bone mineral density.                                                                                                     | Journal of alternative and complementary medicine (new york, N.Y.) | China, Taiwan | postmenopausal                       | 47  | 10 wks | local thermal therapy | 1 | 2 |
| Chung, D. J.      | 2007 | Black cohosh and St. John's wort (GYNO-Plus) for climacteric symptoms.                                                                                                             | Yonsei Medical Journal                                             | Korean        | perimenopausal                       | 89  | 12 wks | dietary supplements   | 4 | 5 |
| Cohen, L., et al. | 2014 | Efficacy of omega-3 for vasomotor symptoms treatment: a randomized controlled trial.                                                                                               | Menopause                                                          | USA           | peri and postmenopausal and surgical | 355 | 12 wks | dietary supplements   | 3 | 6 |
| Colau, J. C       | 2012 | Efficacy of a non-hormonal treatment, BRN-01, on menopausal HF: a multicenter, randomized, double-blind, placebo-controlled trial                                                  | Drugs in R & D                                                     | France        | postmenopausal                       | 108 | 12 wks | BRN-01                | 5 | 6 |
| Cortés-Bonilla, M | 2015 | Treatment of menopausal symptoms with three low-dose continuous sequential 17 $\beta$ -estradiol/progesterone parenteral monthly                                                   | Gynecological endocrinology                                        | Mexico        | peri and postmenopausal              | 103 | 6 mos  | oral HRT              | 3 | 6 |

|                   |      |                                                                                                                                                                            |                                         |                   |                             |     |        |                     |   |   |
|-------------------|------|----------------------------------------------------------------------------------------------------------------------------------------------------------------------------|-----------------------------------------|-------------------|-----------------------------|-----|--------|---------------------|---|---|
| Daley, A., et al. | 2015 | formulations using novel non-polymeric microsphere technology<br>The effectiveness of exercise as treatment for vasomotor menopausal symptoms: randomised controlled trial | BJOG                                    | UK, West Midlands | peri and postmenopausal     | 261 | 6 mos  | exercise            | 2 | 6 |
| Davinelli, S.     | 2017 | Influence of equol and resveratrol supplementation on health-related quality of life in menopausal women: A randomized, placebo-controlled study                           | Maturitas                               | Italy             | postmenopausal              | 60  | 12 wks | S-equol             | 5 | 2 |
| Davis, S. R.,     | 2017 | The effects of Chinese medicinal herbs on postmenopausal vasomotor symptoms of Australian women. A randomised controlled trial.                                            | Medical Journal of Australia            | Australia         | postmenopausal              | 78  | 12 wks | dietary supplements | 5 | 6 |
| de Luca, A. C     | 2011 | Acupuncture-ameliorated menopausal symptoms: single-blind, placebo-controlled, randomized trial                                                                            | Climacteric                             | Brazil            | postmenopausal              | 80  | 12 wks | acupuncture         | 3 | 2 |
| de Vrijer, B.     | 2000 | Efficacy and tolerability of a new estradiol delivering matrix patch (Estraderm MX) in postmenopausal women                                                                | Maturitas                               | Netherlands       | postmenopausal and surgical | 254 | 12 wks | transdermal HRT     | 4 | 6 |
| del Giorno, C     | 2010 | Effects of Trifolium pratense on the climacteric and sexual symptoms in                                                                                                    | Revista Da Associacao Medica Brasileira | Brazil            | postmenopausal              | 120 | 12 mos | dietary supplements | 5 | 2 |

|               |      |                                                                                                                                                                                                                                               |                              |             |                                      |     |        |                                |   |   |
|---------------|------|-----------------------------------------------------------------------------------------------------------------------------------------------------------------------------------------------------------------------------------------------|------------------------------|-------------|--------------------------------------|-----|--------|--------------------------------|---|---|
| Duijts, S. F. | 2012 | postmenopause women<br>Efficacy of cognitive behavioral therapy and physical exercise in alleviating treatment-induced menopausal symptoms in patients with breast cancer: results of a randomized, controlled, multicenter trial             | Journal of Clinical Oncology | Netherlands | breast cancer                        | 422 | 12 wks | cognitive behavioral treatment | 3 | 5 |
| Ee, C.        | 2016 | Acupuncture for Menopausal HF: A Randomized Trial                                                                                                                                                                                             | Annals of Internal Medicine  | Australia   | peri and postmenopausal and surgical | 127 | 8 wks  | acupuncture                    | 5 | 4 |
| Elkins, G. R. | 2012 | Clinical hypnosis in the treatment of postmenopausal HF: A randomized controlled trial                                                                                                                                                        | Menopause                    | USA, Texas  | postmenopausal and surgical          | 187 | 12 wks | clinical hypnosis              | 2 | 6 |
| Endrikat, J.  | 2007 | A multicenter, prospective, randomized, double-blind, placebo-controlled study to investigate the efficacy of a continuous-combined hormone therapy preparation containing 1mg estradiol valerate/2mg dienogest on HF in postmenopausal women | Maturitas                    | Germany     | postmenopausal and surgical          | 324 | 12 wks | oral HRT                       | 2 | 4 |
| Evans, M.     | 2005 | Management of postmenopausal HF with venlafaxine hydrochloride: a randomized, controlled trial                                                                                                                                                | Obstetrics & Gynecology      | USA         | postmenopausal and surgical          | 80  | 12 wks | SSRI                           | 5 | 2 |

|                        |      |                                                                                                                                                         |                                              |                |                                      |     |        |                     |   |   |
|------------------------|------|---------------------------------------------------------------------------------------------------------------------------------------------------------|----------------------------------------------|----------------|--------------------------------------|-----|--------|---------------------|---|---|
| Evans, M.,             | 2011 | The effect of synthetic genistein on menopause symptom management in healthy postmenopausal women: a multi-center, randomized, placebo-controlled study | Maturitas                                    | Canada         | postmenopausal and surgical          | 84  | 12 wks | isoflavone          | 5 | 2 |
| Faure, E. D.           | 2002 | Effects of a standardized soy extract on HF: a multicenter, double-blind, randomized, placebo-controlled study                                          | Menopause                                    | France         | postmenopausal                       | 75  | 4 mos  | isoflavone          | 4 | 4 |
| Fenlon, D. R.,         | 2008 | A randomized controlled trial of relaxation training to reduce HF in women with primary breast cancer                                                   | Journal of Pain & Symptom Management         | UK             | breast cancer                        | 150 | 3 mos  | relaxation          | 3 | 2 |
| Ferrari, A.            | 2009 | Soy extract phytoestrogens with high dose of isoflavones for menopausal symptoms                                                                        | Journal of Obstetrics & Gynaecology Research | Italy          | postmenopausal                       | 180 | 12 wks | isoflavone          | 5 | 6 |
| Freeman, E. W., et al. | 2011 | Efficacy of escitalopram for HF in healthy menopausal women: a randomized controlled trial                                                              | JAMA                                         | USA            | peri and postmenopausal and surgical | 205 | 8 wks  | SSRI                | 5 | 6 |
| Frei-Kleiner, S.,      | 2005 | Cimicifuga racemosa dried ethanolic extract in menopausal disorders: a double-blind placebo-controlled clinical trial                                   | Maturitas                                    | Switzerland    | peri and postmenopausal              | 122 | 12 wks | dietary supplements | 4 | 6 |
| Fu, S., et al          | 2016 | A randomized, double-blind, placebo-controlled trial of Chinese herbal                                                                                  | Menopause                                    | China, Tianjin | peri and postmenopausal              | 398 | 12 wks | dietary supplements | 4 | 4 |

|                        |      |                                                                                                                                                                                                      |                       |           |                             |     |        |                     |   |   |
|------------------------|------|------------------------------------------------------------------------------------------------------------------------------------------------------------------------------------------------------|-----------------------|-----------|-----------------------------|-----|--------|---------------------|---|---|
| Garcia, J.             | 2010 | medicine granules for the treatment of menopausal symptoms by stages<br>Use of a multibotanical (Nutrafem) for the relief of menopausal vasomotor symptoms: a double-blind, placebo-controlled study | Menopause             | Singapore | postmenopausal              | 159 | 12 wks | dietary supplements | 4 | 6 |
| Gelfand, M. M., et al. | 2003 | Clinical assessment and quality of life of postmenopausal women treated with a new intermittent progestogen combination hormone replacement therapy: a placebo-controlled study.                     | Menopause             | Canada    | postmenopausal              | 119 | 90 d   | oral HRT            | 3 | 4 |
| Geller, S., et al.     | 2009 | Safety and efficacy of black cohosh and red clover for the management of vasomotor symptoms: a randomized controlled trial.                                                                          | Menopause             | USA       | peri and postmenopausal     | 89  | 12 mos | dietary supplements | 5 | 6 |
| Good, W. R.            | 1999 | Comparison of Alora estradiol matrix transdermal delivery system with oral conjugated equine estrogen therapy in relieving menopausal symptoms. Alora Study Group                                    | Climacteric           | USA       | postmenopausal and surgical | 321 | 12 wks | transdermal HRT     | 2 | 6 |
| Good, W. R.            | 1996 | Double-masked, multicenter study of an estradiol matrix transdermal delivery                                                                                                                         | Clinical Therapeutics | USA       | postmenopausal and surgical | 273 | 12 wks | transdermal HRT     | 2 | 6 |

|                     |      |                                                                                                                                                                                                                                                                                            |                                   |     |                             |     |         |                |   |   |
|---------------------|------|--------------------------------------------------------------------------------------------------------------------------------------------------------------------------------------------------------------------------------------------------------------------------------------------|-----------------------------------|-----|-----------------------------|-----|---------|----------------|---|---|
| Goodwin, J., et al. | 2008 | system (Alora) versus placebo in postmenopausal women experiencing menopausal symptoms. Alora Study Group Phase III randomized placebo-controlled trial of two doses of megestrol acetate as treatment for menopausal symptoms in women with breast cancer: southwest Oncology Group Study | with T1-3, N0-1, M0 breast cancer | USA | breast cancer               | 88  | 6 mos   | oral HRT       | 3 | 6 |
| Gordon, P. R        | 2006 | Sertraline to treat HF: a randomized controlled, double-blind, crossover trial in a general population                                                                                                                                                                                     | Menopause                         | USA | postmenopausal              | 102 | 4 weeks | SSRI           | 4 | 2 |
| Grady, D.           | 2007 | Ineffectiveness of sertraline for treatment of menopausal HF: a randomized controlled trial                                                                                                                                                                                                | Obstetrics & Gynecology           | USA | peri and postmenopausal     | 99  | 6 wks   | SSRI           | 4 | 6 |
| Grady, D.           | 2009 | MF101, a selective estrogen receptor beta modulator for the treatment of menopausal HF: a phase II clinical trial                                                                                                                                                                          | Menopause                         | USA | postmenopausal and surgical | 217 | 12 wks  | MF 101         | 4 | 6 |
| Guttuso, T.         | 2003 | Gabapentin's effects on HF in postmenopausal women: a randomized controlled trial                                                                                                                                                                                                          | Obstetrics & Gynecology           | USA | postmenopausal and surgical | 59  | 12 wks  | Antiepileptics | 4 | 6 |
| Guttuso, T.,        | 2008 | Effects of L-isoleucine and L-valine on HF and serum homocysteine: a randomized controlled trial                                                                                                                                                                                           | Obstetrics & Gynecology           | USA | postmenopausal              | 86  | 12 wks  | L-isoleucine   | 5 | 6 |

|                            |      |                                                                                                                                                                                     |             |                                                               |                                      |     |        |                     |   |   |
|----------------------------|------|-------------------------------------------------------------------------------------------------------------------------------------------------------------------------------------|-------------|---------------------------------------------------------------|--------------------------------------|-----|--------|---------------------|---|---|
| Haimov-Kochman, R., et al. | 2006 | Gradual discontinuation of hormone therapy does not prevent the reappearance of climacteric symptoms: a randomized prospective study                                                | Menopause   | Hongkong                                                      | postmenopausal                       | 91  | 12 mos | oral HRT            | 1 | 2 |
| Haines, C., et al.         | 2009 | Micro-dose transdermal estradiol for relief of HF in postmenopausal Asian women: a randomized controlled trial.                                                                     | Climacteric | Thailand, the Philippines, Singapore, Hong Kong and Malaysia. | postmenopausal and surgical          | 65  | 12 wks | oral HRT            | 4 | 6 |
| Haines, C., et al.         | 2008 | A randomized, double-blind, placebo-controlled study of the effect of a Chinese herbal medicine preparation (Dang Gui Buxue Tang) on menopausal symptoms in Hong Kong Chinese women | Climacteric | Hongkong                                                      | postmenopausal                       | 103 | 12 wks | dietary supplements | 5 | 4 |
| Hardy, C.                  | 2018 | Self-help cognitive behavior therapy for working women with problematic HF and NS (MENOS@Work): a multicenter randomized controlled trial                                           | Menopause   | UK                                                            | peri and postmenopausal and surgical | 124 | 20 wks | cognitive therapy   | 3 | 6 |
| Hattersley, G., et al.     | 2017 | Clinical investigation of RAD1901, a novel estrogen receptor ligand, for the treatment of postmenopausal vasomotor symptoms:                                                        | Menopause   | USA                                                           | postmenopausal and surgical          | 100 | 4 wks  | RAD 1901            | 4 | 5 |

|                       |      |                                                                                                                                                                                           |                             |          |                             |     |        |                     |   |   |
|-----------------------|------|-------------------------------------------------------------------------------------------------------------------------------------------------------------------------------------------|-----------------------------|----------|-----------------------------|-----|--------|---------------------|---|---|
| Hedrick, R. E., et al | 2009 | a phase 2 randomized, placebo-controlled Transdermal estradiol gel 0.1% for the treatment of vasomotor symptoms in postmenopausal women                                                   | Menopause                   | USA      | postmenopausal and surgical | 488 | 12 wks | transdermal HRT     | 2 | 6 |
| Heger, M.,            | 2006 | Efficacy and safety of a special extract of Rheum rhaponticum (ERr 731) in perimenopausal women with climacteric complaints: a 12-week randomized, double-blind, placebo-controlled trial | Menopause                   | Ukraine  | perimenopausal              | 109 | 12 wks | Err 731             | 5 | 6 |
| Heyerick, A., et al.  | 2006 | A first prospective, randomized, double-blind, placebo-controlled study on the use of a standardized hop extract to alleviate menopausal discomforts                                      | Maturitas                   | Belgium, | postmenopausal              | 76  | 12 wks | dietary supplements | 4 | 2 |
| Hidalgo, L. A.        | 2005 | The effect of red clover isoflavones on menopausal symptoms, lipids and vaginal cytology in menopausal women: A randomized, double-blind, placebo-controlled study                        | Gynecological Endocrinology | Ecuador  | postmenopausal              | 53  | 180 d  | isoflavone          | 5 | 2 |
| Hilditch, J. R.       | 1996 | A comparison of the effects of oral conjugated equine estrogen and transdermal estradiol-17 beta combined with an oral progestin on                                                       | Maturitas                   | Canada   | postmenopausal              | 84  | 14 wks | oral HRT            | 3 | 2 |

|                            |      |                                                                                                                                                                         |                                                        |         |                                      |     |        |                     |   |   |
|----------------------------|------|-------------------------------------------------------------------------------------------------------------------------------------------------------------------------|--------------------------------------------------------|---------|--------------------------------------|-----|--------|---------------------|---|---|
| Hitchcock, C. and J. Prior | 2012 | quality of life in postmenopausal women<br>Oral micronized progesterone for vasomotor symptoms-- a placebo-controlled randomized trial in healthy postmenopausal women. | Menopause                                              | Canada  | postmenopausal                       | 133 | 16 wks | oral HRT            | 1 | 4 |
| Holst, T. and B. Salbach   | 2000 | Efficacy and tolerability of a new 7-day transdermal estradiol patch versus placebo in hysterectomized women with postmenopausal complaints                             | Maturitas                                              | Germany | postmenopausal and surgical          | 221 | 3 mos  | transdermal HRT     | 3 | 2 |
| Honjo, H.                  | 2009 | Low-dose estradiol for climacteric symptoms in Japanese women: a randomized, controlled trial                                                                           | Climacteric                                            | Japan   | postmenopausal and surgical          | 211 | 8 wks  | oral HRT            | 4 | 6 |
| Huang, A.                  | 2015 | Device-guided slow-paced respiration for menopausal HF: a randomized controlled trial                                                                                   | Obstetrics & Gynecology                                | USA     | peri and postmenopausal and surgical | 123 | 12 wks | respiration         | 1 | 6 |
| Hudita, D.                 | 2003 | Efficacy and safety of oral tibolone 1.25 or 2.5 mg/day vs. placebo in postmenopausal women                                                                             | European Review for Medical & Pharmacological Sciences | Romania | postmenopausal                       | 162 | 12 wks | tibolone            | 3 | 6 |
| Jacobson, J. S.            | 2001 | Randomized trial of black cohosh for the treatment of HF among women with a history of breast cancer                                                                    | Journal of Clinical Oncology                           | USA     | breast cancer                        | 85  | 2 mos  | dietary supplements | 3 | 2 |
| Jenabi, E.,                | 2018 | The effect of Valerian on the severity and                                                                                                                              | Women & Health                                         | Iran    | postmenopausal                       | 64  | 2 mo   | dietary supplements | 5 | 2 |

|                   |      |                                                                                                                                                             |                                                   |               |                             |     |        |             |   |   |
|-------------------|------|-------------------------------------------------------------------------------------------------------------------------------------------------------------|---------------------------------------------------|---------------|-----------------------------|-----|--------|-------------|---|---|
| Jenks, B. H.      | 2012 | frequency of HF: A triple-blind randomized clinical trial<br>A pilot study on the effects of S-equol compared to soy isoflavones on menopausal HF frequency | Journal of Women's Health                         | USA           | postmenopausal              | 102 | 8 wks  | S-equol     | 5 | 6 |
| Joffe, H., et al. | 2014 | Low-dose estradiol and the serotonin-norepinephrine reuptake inhibitor venlafaxine for vasomotor symptoms: a randomized clinical trial.                     | JAMA Internal Medicine                            | USA           | peri and postmenopausal     | 339 | 8 wks  | SSRI        | 5 | 6 |
| Jou, H.           | 2008 | Effect of intestinal production of equol on menopausal symptoms in women treated with soy isoflavones                                                       | International Journal of Gynaecology & Obstetrics | China, Taiwan | postmenopausal              | 96  | 6 mos  | isoflavone  | 5 | 2 |
| Kalay, A. E       | 2007 | Efficacy of citalopram on climacteric symptoms                                                                                                              | Menopause                                         | Turkey        | postmenopausal and surgical | 100 | 8 wks  | SSRI        | 2 | 2 |
| Kaszkin-Bettag    | 2009 | Confirmation of the efficacy of ERr 731 in perimenopausal women with menopausal symptoms                                                                    | Alternative Therapies in Health & Medicine        | Ukraine       | perimenopausal              | 112 | 12 wks | Err 731     | 5 | 6 |
| Khaodhiar, L.     | 2008 | Daidzein-rich isoflavone aglycones are potentially effective in reducing HF in menopausal women                                                             | Menopause                                         | USA           | postmenopausal              | 147 | 12 wks | isoflavone  | 1 | 2 |
| Kim, D. I.        | 2011 | Acupuncture for HF in perimenopausal and postmenopausal women: a randomised, sham-controlled trial                                                          | Acupuncture in Medicine                           | South Korea   | peri and postmenopausal     | 55  | 15 wks | acupuncture | 3 | 6 |

|                       |      |                                                                                                                                                                       |                                |                                                |                                      |     |        |                     |   |   |
|-----------------------|------|-----------------------------------------------------------------------------------------------------------------------------------------------------------------------|--------------------------------|------------------------------------------------|--------------------------------------|-----|--------|---------------------|---|---|
| Kim, K. H.            | 2010 | Effects of acupuncture on HF in perimenopausal and postmenopausal women--a multicenter randomized clinical trial                                                      | Menopause                      | South Korea                                    | peri and postmenopausal and surgical | 175 | 8 wks  | acupuncture         | 3 | 6 |
| Kimmick, G            | 2006 | Randomized, double-blind, placebo-controlled, crossover study of sertraline (Zoloft) for the treatment of HF in women with early stage breast cancer taking tamoxifen | Breast Journal                 | USA                                            | breast cancer                        | 62  | 12 wks | SSRI                | 3 | 2 |
| Kitanohara, M., et al | 2017 | Effect of porcine placental extract on the mild menopausal symptoms of climacteric women                                                                              | Climacteric                    | Japan                                          | postmenopausal                       | 50  | 12 wks | dietary supplements | 5 | 4 |
| Kroiss, R.            | 2005 | The effect of tibolone in postmenopausal women receiving tamoxifen after surgery for breast cancer: a randomised, double-blind, placebo-controlled trial              | BJOG                           | UK                                             | breast cancer                        | 70  | 12 mos | tibolone            | 4 | 6 |
| LaCroix, A., et al.   | 2012 | Effects of escitalopram on menopause-specific quality of life and pain in healthy menopausal women with HF: a randomized controlled trial.                            | Maturitas                      | USA,Boston, Indianapolis ,Oakland,Philadelphia | peri and postmenopausal              | 205 | 8 wks  | SSRI                | 1 | 4 |
| Lambert, M., et al.   | 2017 | Combined Red Clover isoflavones and probiotics potentially reduce menopausal vasomotor symptoms                                                                       | PLoS ONE [Electronic Resource] | Denmark                                        | perimenopausal                       | 61  | 12 mos | isoflavone          | 4 | 6 |

|                   |      |                                                                                                                                                                     |                              |                                             |                                      |     |        |             |   |   |
|-------------------|------|---------------------------------------------------------------------------------------------------------------------------------------------------------------------|------------------------------|---------------------------------------------|--------------------------------------|-----|--------|-------------|---|---|
| Landgren, M. B    | 2002 | Dose-response analysis of effects of tibolone on climacteric symptoms                                                                                               | BJOG                         | Sweden, the Netherlands, Finland and Norway | postmenopausal                       | 775 | 12 wks | tibolone    | 5 | 6 |
| Lee, B. S.        | 2007 | Efficacy and tolerability of estradiol 1 mg and drospirenone 2 mg in postmenopausal Korean women: a double-blind, randomized, placebo-controlled, multicenter study | Maturitas                    | South Korea                                 | postmenopausal                       | 158 | 12 wks | oral HRT    | 3 | 6 |
| Lesi, G., et al.  | 2016 | Acupuncture As an Integrative Approach for the Treatment of HF in Women With Breast Cancer: a Prospective Multicenter Randomized Controlled Trial (AcCliMaT).       | Journal of Clinical Oncology | Italy                                       | breast cancer                        | 105 | 12 wks | acupuncture | 3 | 6 |
| Lewis, J. E.      | 2006 | A randomized controlled trial of the effect of dietary soy and flaxseed muffins on quality of life and HF during menopause                                          | Menopause                    | Canada                                      | postmenopausal                       | 99  | 16 wks | isoflavone  | 5 | 6 |
| Lin, S., et al.   | 2011 | Estradiol 1 mg and drospirenone 2 mg as hormone replacement therapy in postmenopausal Chinese women                                                                 | Climacteric                  | China                                       | peri and postmenopausal and surgical | 249 | 16 wks | oral HRT    | 5 | 6 |
| Lindh-Astrand, L. | 2010 | A randomized controlled study of taper-down or abrupt discontinuation of hormone therapy in women treated for vasomotor symptoms                                    | Menopause                    | Sweden                                      | postmenopausal                       | 81  | 12 mos | oral HRT    | 2 | 6 |

|                                    |      |                                                                                                                                         |                             |                                                    |                             |     |        |                |   |   |
|------------------------------------|------|-----------------------------------------------------------------------------------------------------------------------------------------|-----------------------------|----------------------------------------------------|-----------------------------|-----|--------|----------------|---|---|
| Lindh-Astrand, L. and E. Nedstrand | 2012 | Effects of applied relaxation on vasomotor symptoms in postmenopausal women: A randomized controlled trial.                             | Menopause                   | Sweden                                             | postmenopausal              | 60  | 6 mos  | relaxation     | 3 | 6 |
| Lipovac, M., et al.                | 2012 | The effect of red clover isoflavone supplementation over vasomotor and menopausal symptoms in postmenopausal women.                     | Gynecological Endocrinology | Austria                                            | postmenopausal              | 109 | 187d   | isoflavone     | 3 | 2 |
| Liu, J. H., et al.                 | 2012 | Synthetic conjugated estrogens-B and postmenopausal nocturnal vasomotor symptoms: a randomized controlled trial.                        | Obstetrics & Gynecology     | USA                                                | postmenopausal and surgical | 157 | 12 wks | oral HRT       | 5 | 6 |
| Liu, Zhao-min                      | 2014 | Randomized controlled trial of whole soy and isoflavone daidzein on menopausal symptoms in equol-producing Chinese postmenopausal women | Menopause                   | China, Hongkong                                    | postmenopausal              | 270 | 6 mos  | isoflavone     | 5 | 2 |
| Loibl, S.                          | 2007 | Venlafaxine is superior to clonidine as treatment of HF in breast cancer patients - A double-blind, randomized study                    | Annals of Oncology          | Germany                                            | breast cancer               | 80  | 4 wks  | SSRI           | 3 | 6 |
| Lopes, P., et al.                  | 2000 | Randomized comparison of intranasal and transdermal estradiol                                                                           | Obstetrics and Gynecology   | Spain, France, Poland, Netherland, Belgium, Italy, | postmenopausal              | 361 | 16 wks | intranasal HRT | 3 | 4 |

|                      |      |                                                                                                                                                                                                                               |                                     |                               |                             |     |        |            |   |   |
|----------------------|------|-------------------------------------------------------------------------------------------------------------------------------------------------------------------------------------------------------------------------------|-------------------------------------|-------------------------------|-----------------------------|-----|--------|------------|---|---|
| Loprinzi, C. L.      | 2010 | Phase III, randomized, double-blind, placebo-controlled evaluation of pregabalin for alleviating HF, N07C1.[Erratum appears in J Clin Oncol. 2010 Apr 1;28(10):1808 Note: Baclueva, Ernie P [corrected to Balcueva, Ernie P]] | Journal of Clinical Oncology        | USA                           | breast cancer               | 163 | 6 wks  | pregabalin | 5 | 6 |
| Loprinzi, C. L.,     | 2000 | Venlafaxine in management of HF in survivors of breast cancer: A randomised controlled trial                                                                                                                                  | Lancet                              | USA                           | breast cancer               | 229 | 4 wks  | SSRI       | 5 | 6 |
| Loprinzi, C., et al. | 2006 | Phase III comparison of depomedroxyprogesterone acetate to venlafaxine for managing HF: north Central Cancer Treatment Group Trial N99C7                                                                                      | Journal of Clinical Oncology        | USA                           | breast cancer               | 227 | 6 wks  | SSRI       | 2 | 4 |
| Luoto, R.            | 2012 | Effect of aerobic training on HF and quality of life--a randomized controlled trial                                                                                                                                           | Annals of Medicine                  | Finland                       | postmenopausal              | 176 | 24 wks | exercise   | 3 | 6 |
| MacGregor, C. A.     | 2005 | A randomised double-blind controlled trial of oral soy supplements versus placebo for treatment of menopausal symptoms in patients with early breast cancer                                                                   | European Journal of Cancer          | UK                            | breast cancer               | 72  | 12 wks | isoflavone | 4 | 6 |
| Malik, S., et a      | 2016 | "Comparison of the symptomatic response in Indian menopausal women with different                                                                                                                                             | Archives of Gynecology & Obstetrics | Indi,VMCC and SJH, New Delhia | postmenopausal and surgical | 200 | 24 wks | oral HRT   | 2 | 6 |

|                         |      |                                                                                                                                                                                                                                                |                                             |                                                                   |                             |     |        |                                 |   |   |
|-------------------------|------|------------------------------------------------------------------------------------------------------------------------------------------------------------------------------------------------------------------------------------------------|---------------------------------------------|-------------------------------------------------------------------|-----------------------------|-----|--------|---------------------------------|---|---|
| Mann, E.                | 2012 | estrogen preparations for the treatment of menopausal symptoms: a randomized controlled trial<br>Cognitive behavioural treatment for women who have menopausal symptoms after breast cancer treatment (MENOS 1): a randomised controlled trial | Lancet                                      | UK                                                                | breast cancer               | 96  | 9 wks  | Cognitive behavioural treatment | 5 | 6 |
| Mattsson, L. A.         | 2000 | Clinical equivalence of intranasal and oral 17beta-estradiol for postmenopausal symptoms                                                                                                                                                       | American Journal of Obstetrics & Gynecology | Sweden, Denmark, Spain, France, UK, Netherlands                   | postmenopausal              | 649 | 24 wks | intranasal HRT                  | 5 | 6 |
| Mattsson, L. A., et al. | 2007 | Efficacy and tolerability of continuous combined hormone replacement therapy in early postmenopausal women                                                                                                                                     | Menopause International                     | Czech, Denmark, Finland, Germany, Hungary, Poland, Russia, Sweden | postmenopausal and surgical | 459 | 52 wks | oral HRT                        | 2 | 6 |
| Meng, F., et al.        | 2017 | Effect of Gua sha therapy on perimenopausal syndrome: a randomized controlled trial.                                                                                                                                                           | Menopause                                   | China, Nanjing                                                    | perimenopausal              | 75  | 8 wks  | GuaSha                          | 3 | 2 |
| Meuwissen, J. H.        | 2001 | A 1-year comparison of the efficacy and clinical tolerance in postmenopausal women of two hormone replacement therapies containing estradiol in                                                                                                | Gynecological Endocrinology                 | Netherlands, Finland, Argentina, France, South Africa             | postmenopausal              | 634 | 12 wks | oral HRT                        | 3 | 6 |

|                                 |      |                                                                                                                                                                                                |                             |                                           |                             |     |        |                     |   |   |
|---------------------------------|------|------------------------------------------------------------------------------------------------------------------------------------------------------------------------------------------------|-----------------------------|-------------------------------------------|-----------------------------|-----|--------|---------------------|---|---|
| Mizunuma, H.                    | 2011 | combination with either norgestrel or trimegestone<br>Clinical usefulness of a low-dose maintenance therapy with transdermal estradiol gel in Japanese women with estrogen deficiency symptoms | Climacteric                 | Japan                                     | postmenopausal and surgical | 209 | 12 wks | transdermal HRT     | 4 | 6 |
| Mohammad-Alizadeh-Charandabi, S | 2013 | Efficacy of black cohosh (Cimicifuga racemosa L.) in treating early symptoms of menopause: a randomized clinical trial                                                                         | Chinesische Medizin         | Iran                                      | postmenopausal              | 84  | 8 wks  | dietary supplements | 5 | 6 |
| Morais-Socorro, M.              | 2012 | Safety and efficacy of tibolone and menopausal transition: a randomized, double-blind placebo-controlled trial                                                                                 | Gynecological Endocrinology | Brazil                                    | peri and postmenopausal     | 65  | 12 wks | tibolone            | 3 | 1 |
| Newton, K. M., et al            | 2014 | Efficacy of yoga for vasomotor symptoms: a randomized controlled trial.                                                                                                                        | Menopause                   | USA, Indianapolis, Oakland, Philadelphia, | peri and postmenopausal     | 249 | 12 wks | exercise            | 3 | 6 |
| Newton, K., et al.              | 2006 | Treatment of vasomotor symptoms of menopause with black cohosh, multibotanicals, soy, hormone therapy, or placebo: a randomized trial.                                                         | Annals of Internal Medicine | USA, Washinton                            | peri and postmenopausal     | 351 | 12 mos | dietary supplements | 5 | 4 |
| Notelovitz, M. and J. Mattox    | 2000 | Suppression of vasomotor and vulvovaginal symptoms with continuous oral 17beta-estradiol                                                                                                       | Menopause                   | USA                                       | postmenopausal              | 145 | 12 mos | oral HRT            | 2 | 6 |

|                       |      |                                                                                                                               |                                             |                               |                             |     |        |                     |   |   |
|-----------------------|------|-------------------------------------------------------------------------------------------------------------------------------|---------------------------------------------|-------------------------------|-----------------------------|-----|--------|---------------------|---|---|
| Notelovitz, M., et al | 2000 | Initial 17beta-estradiol dose for treating vasomotor symptoms                                                                 | Obstetrics and Gynecology                   | USA                           | postmenopausal              | 333 | 12 wks | oral HRT            | 4 | 2 |
| Oktem, M.             | 2007 | Black cohosh and fluoxetine in the treatment of postmenopausal symptoms: a prospective, randomized trial                      | Advances in Therapy                         | Turkey                        | postmenopausal              | 120 | 6 mos  | dietary supplements | 1 | 4 |
| Osmers, R             | 2005 | Efficacy and safety of isopropanolic black cohosh extract for climacteric symptoms                                            | Obstetrics & Gynecology                     | Germany                       | postmenopausal              | 304 | 12 wks | dietary supplements | 5 | 6 |
| Palacios, S           | 2017 | Omega-3 versus isoflavones in the control of vasomotor symptoms in postmenopausal women                                       | Gynecological Endocrinology                 | Spain                         | postmenopausal              | 65  | 4 mos  | isoflavone          | 2 | 6 |
| Palacios, S.,         | 2004 | Raloxifene is not associated with biologically relevant changes in HF in postmenopausal women for whom therapy is appropriate | American Journal of Obstetrics & Gynecology | Brazil                        | postmenopausal and surgical | 487 | 8 mos  | SSRI                | 4 | 4 |
| Panay, N., et al.     | 2007 | Ultra-low-dose estradiol and norethisterone acetate: effective menopausal symptom relief.                                     | Climacteric                                 | UK, USA, Finland, Switzerland | postmenopausal              | 577 | 24 wks | oral HRT            | 2 | 6 |
| Pandya, K. J.         | 2005 | Gabapentin for HF in 420 women with breast cancer: a randomised double-blind placebo-controlled trial                         | Lancet                                      | USA                           | breast cancer               | 371 | 8 wks  | Antiepileptics      | 5 | 4 |
| Park, H.              | 2015 | North Central Cancer Treatment Group N10C2 (Alliance): a double-blind placebo-                                                | Menopause                                   | South Korea                   | breast cancer               | 289 | 8 wks  | Antiepileptics      | 3 | 6 |

|                       |      |                                                                                                                                                                                          |                             |     |                             |     |        |                  |   |   |
|-----------------------|------|------------------------------------------------------------------------------------------------------------------------------------------------------------------------------------------|-----------------------------|-----|-----------------------------|-----|--------|------------------|---|---|
| Parsey, K.            | 2000 | controlled study of magnesium supplements to reduce menopausal HF<br>Randomised, controlled comparison of transdermal estradiol with oral conjugated estrogens for the relief of HF      | Clinical Drug Investigation | USA | postmenopausal              | 193 | 8 wks  | oral HRT         | 5 | 4 |
| Pinkerton, J. V.      | 2014 | Phase 3 randomized controlled study of gastroretentive gabapentin for the treatment of moderate-to-severe HF in menopause                                                                | Menopause                   | USA | postmenopausal              | 600 | 12 wks | Antiepileptics   | 5 | 6 |
| Pinkerton, J., et al. | 2009 | Relief of vasomotor symptoms with the tissue-selective estrogen complex containing bazedoxifene/conjugated estrogens: a randomized, controlled trial.                                    | Menopause                   | USA | postmenopausal              | 332 | 12 wks | oral HRT         | 4 | 6 |
| Pinkerton, J., et al. | 2013 | Desvenlafaxine compared with placebo for treatment of menopausal vasomotor symptoms: a 12-week, multicenter, parallel-group, randomized, double-blind, placebo-controlled efficacy trial | Menopause                   | USA | postmenopausal              | 365 | 12 wks | SSRI             | 4 | 4 |
| Plotnikoff, G. A.     | 2011 | The TU-025 keishibukuryogan clinical trial for HF management in postmenopausal women: results and                                                                                        | Menopause                   | USA | postmenopausal and surgical | 178 | 12 wks | keishibukuryogan | 3 | 4 |

|                   |      |                                                                                                                                                                                                                                                            |                                                                    |                                                                       |                |      |          |                     |   |   |
|-------------------|------|------------------------------------------------------------------------------------------------------------------------------------------------------------------------------------------------------------------------------------------------------------|--------------------------------------------------------------------|-----------------------------------------------------------------------|----------------|------|----------|---------------------|---|---|
| Pockaj, B. A.     | 2006 | <p>lessons for future research</p> <p>Phase III double-blind, randomized, placebo-controlled crossover trial of black cohosh in the management of HF: NCCTG Trial N01CC1</p>                                                                               | Journal of Clinical Oncology                                       | USA                                                                   | breast cancer  | 132  | 8 wks    | dietary supplements | 3 | 4 |
| Polisseni, A. F., | 2013 | <p>Effects of a continuous-combined regimen of low-dose hormone therapy (oestradiol and norethindrone acetate) and tibolone on the quality of life in symptomatic postmenopausal women: a double-blind, randomised study</p>                               | Maturitas                                                          | Brazil                                                                | postmenopausal | 174  | 12 wks   | tibolone            | 5 | 6 |
| Pornel, B.        | 1996 | <p>Efficacy and safety of Menorest in two positive-controlled studies</p>                                                                                                                                                                                  | European Journal of Obstetrics, Gynecology, & Reproductive Biology | UK, Italy, Newzealand, Australia, Belgium, Netherland, France         | postmenopausal | 214  | 12 wks   | oral HRT            | 2 | 2 |
| Pornel, B.        | 2005 | <p>A study of the control of climacteric symptoms in postmenopausal women following sequential regimens of 1 mg 17beta-estradiol and trimegestone compared with a regimen containing 1 mg estradiol valerate and norethisterone over a two-year period</p> | Gynecological Endocrinology                                        | Belgium, Czech, France, Germany, Switzerland, Isarel, UK, Netherlands | postmenopausal | 1218 | cycle 13 | oral HRT            | 4 | 6 |
| Pornel, B., et al | 1995 | <p>Efficacy and tolerability of Menorest 50 compared with</p>                                                                                                                                                                                              | Maturitas                                                          | Belgium, Finland,                                                     | postmenopausal | 205  | 12 wks   | oral HRT            | 2 | 6 |

|                |      |                                                                                                                                                                    |                                                     |                     |                             |     |        |                     |   |   |  |
|----------------|------|--------------------------------------------------------------------------------------------------------------------------------------------------------------------|-----------------------------------------------------|---------------------|-----------------------------|-----|--------|---------------------|---|---|--|
|                |      | Estraderm TTS 50 in the treatment of postmenopausal symptoms. A randomized, multicenter, parallel group study                                                      |                                                     | Sweden, Netherlands |                             |     |        |                     |   |   |  |
| Prague, J. K   | 2017 | Neurokinin 3 receptor antagonism as a novel treatment for menopausal HF: a phase 2, randomised, double-blind, placebo-controlled trial                             | Lancet                                              | UK                  | postmenopausal              | 68  | 4 wks  | Neurokinin 3        | 5 | 6 |  |
| Pruthi, S.     | 2012 | A phase III, randomized, placebo-controlled, double-blind trial of flaxseed for the treatment of HF: North Central Cancer Treatment Group N08C7                    | Menopause                                           | USA                 | breast cancer               | 188 | 6 wks  | dietary supplements | 4 | 6 |  |
| Raynaud, J. P. | 2005 | Comparison of the efficacy and tolerability of a new once-a-week matricial estradiol transdermal system (Estrapatch 40 and Estrapatch 60) with a twice week system | Journal of Steroid Biochemistry & Molecular Biology | Austria             | postmenopausal              | 496 | 4 wks  | transdermal HRT     | 2 | 6 |  |
| Reddy, S. Y.   | 2006 | Gabapentin, estrogen, and placebo for treating HF: a randomized controlled trial                                                                                   | Obstetrics & Gynecology                             | USA                 | postmenopausal and surgical | 60  | 12 wks | Antiepileptics      | 5 | 4 |  |
| Rovati, L. C., | 2000 | Dose-response efficacy of a new estradiol transdermal matrix patch for 7-day application: a randomized, double-                                                    | Gynecological Endocrinology                         | Italy               | postmenopausal and surgical | 311 | 12 wks | transdermal HRT     | 4 | 6 |  |

|                       |      |                                                                                                                                                                                                                         |                                                      |                                                      |                                      |     |        |                     |   |   |
|-----------------------|------|-------------------------------------------------------------------------------------------------------------------------------------------------------------------------------------------------------------------------|------------------------------------------------------|------------------------------------------------------|--------------------------------------|-----|--------|---------------------|---|---|
| Rozenbaum, H., et al. | 2002 | blind, placebo-controlled study. Italian Menopause Research Group<br>Efficacy and tolerability of pulsed estrogen therapy: A 12-week double-blind placebo-controlled study in highly symptomatic postmenopausal women.  | Climacteric                                          | France                                               | postmenopausal                       | 165 | 8 wks  | intranasal HRT      | 3 | 4 |
| Rozenberg, S.         | 1997 | Comparison of continuous and sequential transdermal progestogen with sequential oral progestogen in postmenopausal women using continuous transdermal estrogen: vasomotor symptoms, bleeding patterns, and serum lipids | International Journal of Fertility & Womens Medicine | Belgium<br>Finland,<br>Sweden,<br>UK,<br>Netherlands | postmenopausal                       | 774 | 14 wks | transdermal HRT     | 2 | 3 |
| Saensak, S.           | 2013 | Effectiveness of a modified version of the applied relaxation technique in treatment of perimenopausal and postmenopausal symptoms                                                                                      | International Journal of Women's Health              | Thailand                                             | peri and postmenopausal and surgical | 105 | 12 wks | relaxation          | 3 | 2 |
| Sangwan, P., et al.   | 2015 | A comparative study of efficacy and safety of red clover versus conjugated estrogen on vasomotor symptoms and sleep patterns in postmenopausal women.                                                                   | Indo Global Journal of Pharmaceutical Sciences       | India                                                | postmenopausal                       | 50  | 12 wks | dietary supplements | 2 | 4 |

|                          |      |                                                                                                                                                                                     |                                                       |                     |                |     |        |                     |   |   |
|--------------------------|------|-------------------------------------------------------------------------------------------------------------------------------------------------------------------------------------|-------------------------------------------------------|---------------------|----------------|-----|--------|---------------------|---|---|
| Schellenberg, R., et al. | 2012 | Dose-dependent effects of the <i>Cimicifuga racemosa</i> extract Ze 450 in the treatment of climacteric complaints: A randomized, placebo-controlled study                          | Evidence-based Complementary and Alternative Medicine | Switzerland         | postmenopausal | 105 | 12 wks | dietary supplements | 3 | 6 |
| Schurmann, R.            | 2004 | Estradiol and drospirenone for climacteric symptoms in postmenopausal women: a double-blind, randomized, placebo-controlled study of the safety and efficacy of three dose regimens | Climacteric                                           | Germany, Netherland | postmenopausal | 225 | 16 wks | oral HRT            | 4 | 6 |
| Secreto, G., et al.      | 2004 | Soy isoflavones and melatonin for the relief of climacteric symptoms: a multicenter, double-blind, randomized study.                                                                | Maturitas                                             | Italy               | postmenopausal | 262 | 4 mos  | isoflavone          | 5 | 6 |
| Sehhatie Shafaie, F.     | 2014 | Effect of Education through Support - Group on Early Symptoms of Menopause: a Randomized Controlled Trial                                                                           | Journal of Caring Sciences                            | Iran                | postmenopausal | 124 | 4 wks  | education           | 3 | 6 |
| Shamshad Begum, S.       | 2016 | A Novel Extract of Fenugreek Husk (FenuSMARTTM) Alleviates Postmenopausal Symptoms and Helps to Establish the Hormonal Balance: A Randomized, Double-                               | Phytotherapy Research                                 | India               | postmenopausal | 88  | 90 d   | dietary supplements | 4 | 2 |

|                     |      |                                                                                                                                                                                                                                                                      |                                |      |                             |     |        |                 |   |   |
|---------------------|------|----------------------------------------------------------------------------------------------------------------------------------------------------------------------------------------------------------------------------------------------------------------------|--------------------------------|------|-----------------------------|-----|--------|-----------------|---|---|
| Shobeiri, F.        | 2017 | Blind, Placebo-Controlled Study<br>The Effect of Educational Program on Quality of Life in Menopausal Women: A Clinical Trial                                                                                                                                        | Journal of menopausal medicine | Iran | postmenopausal              | 100 | 3 mos  | education       | 2 | 1 |
| Shulman, L. P.,     | 2002 | Safety and efficacy of a continuous once-a-week 17beta-estradiol/levonorgestrel transdermal system and its effects on vasomotor symptoms and endometrial safety in postmenopausal women: the results of two multicenter, double-blind, randomized, controlled trials | Menopause                      | USA  | peri and postmenopausal     | 293 | 4 wks  | transdermal HRT | 4 | 6 |
| Simon, J            | 2006 | Estradiol in micellar nanoparticles: the efficacy and safety of a novel transdermal drug-delivery technology in the management of moderate to severe vasomotor symptoms                                                                                              | Menopause                      | USA  | postmenopausal and surgical | 200 | 12 wks | transdermal HRT | 4 | 6 |
| Simon, J. A         | 2013 | Low-dose paroxetine 7.5 mg for menopausal vasomotor symptoms: two randomized controlled trials                                                                                                                                                                       | Menopause                      | USA  | postmenopausal and surgical | 591 | 24 wks | SSRI            | 5 | 4 |
| Simon, J. A., et al | 2001 | Perimenopausal women in estrogen vasomotor trials: contribution to placebo effect and efficacy outcome.                                                                                                                                                              | Menopause                      | USA  | postmenopausal and surgical | 120 | 12 wks | oral HRT        | 4 | 4 |

|                     |      |                                                                                                                                  |                         |             |                             |     |        |                     |   |   |
|---------------------|------|----------------------------------------------------------------------------------------------------------------------------------|-------------------------|-------------|-----------------------------|-----|--------|---------------------|---|---|
| Simon, J., et al    | 2016 | Extended-release oxybutynin therapy for vasomotor symptoms in women: a randomized clinical trial.                                | Menopause               | USA         | postmenopausal and surgical | 148 | 12 wks | oxybutynin          | 5 | 6 |
| Simon, J., et al.   | 2007 | Low dose of transdermal estradiol gel for treatment of symptomatic postmenopausal women: a randomized controlled trial.          | Obstetrics & Gynecology | USA, Canada | postmenopausal and surgical | 484 | 12 wks | transdermal HRT     | 5 | 6 |
| Sluijs, C., et al.  | 2009 | randomized placebo-controlled trial on the effectiveness of an herbal formula to alleviate menopausal vasomotor symptoms.        | Menopause               | Australia   | postmenopausal              | 93  | 16 wks | dietary supplements | 5 | 6 |
| Sood, R., et al.    | 2013 | Paced breathing compared with usual breathing for HF                                                                             | Menopause               | USA         | breast cancer               | 93  | 9 wks  | respiration         | 2 | 2 |
| Speroff, L          | 2003 | Efficacy and tolerability of a novel estradiol vaginal ring for relief of menopausal symptoms."                                  | Obstetrics & Gynecology | USA         | postmenopausal              | 333 | 13 wks | HRT vaginal ring    | 3 | 4 |
| Speroff, L., et al  | 2008 | Efficacy and tolerability of desvenlafaxine succinate treatment for menopausal vasomotor symptoms: a randomized controlled trial | Obstetrics & Gynecology | USA         | postmenopausal              | 612 | 12 wks | SSRI                | 5 | 6 |
| Speroff, L., et al. | 2006 | "Efficacy of a new, oral estradiol acetate formulation for relief of menopause symptoms.                                         | Menopause               | USA         | postmenopausal and surgical | 552 | 12 wks | oral HRT            | 5 | 6 |
| Speroff, L., et al. | 2000 | The effect of varying low-dose combinations of norethindrone                                                                     | Meopause                | USA         | postmenopausal and surgical | 485 | 4 wks  | oral HRT            | 2 | 2 |

|                        |      |                                                                                                                                                                                                                                         |                             |            |                             |     |        |                     |   |   |
|------------------------|------|-----------------------------------------------------------------------------------------------------------------------------------------------------------------------------------------------------------------------------------------|-----------------------------|------------|-----------------------------|-----|--------|---------------------|---|---|
| Speroff, L., et al.    | 1996 | acetate and ethinyl estradiol (femhrt) on the frequency and intensity of vasomotor symptoms<br>Efficacy and local tolerance of a low-dose, 7-day matrix estradiol transdermal system in the treatment of menopausal vasomotor symptoms. | Obstetrics & Gynecology     | USA        | postmenopausal and surgical | 324 | 12 wks | transdermal HRT     | 4 | 2 |
| St Germain, A., et al. | 2001 | Isoflavone-rich or isoflavone-poor soy protein does not reduce menopausal symptoms during 24 weeks of treatment                                                                                                                         | Menopause                   | USA        | perimenopausal              | 69  | 24 wks | isoflavone          | 2 | 6 |
| Stearns, V., et al.    | 2003 | Paroxetine controlled release in the treatment of menopausal HF: a randomized controlled trial.                                                                                                                                         | JAMA                        | USA        | postmenopausal and surgical | 165 | 6 wks  | SSRI                | 4 | 6 |
| Steels, E., et al.     | 2017 | Efficacy of a Proprietary Trigonella foenum-graecum L. De-Husked Seed Extract in Reducing Menopausal Symptoms in Otherwise Healthy Women: a Double-Blind, Randomized, Placebo-Controlled Study                                          | Phytotherapy research : PTR | Australis, | peri and postmenopausal     | 115 | 12 wks | dietary supplements | 5 | 6 |
| Steels, E., et al.     | 2018 | A double-blind, randomized, placebo-controlled trial evaluating safety and efficacy of an ayurvedic                                                                                                                                     | Journal of Herbal Medicine. | Australia  | postmenopausal              | 117 | 12 wks | dietary supplements | 5 | 6 |

|                          |      |                                                                                                                                                                                                                      |           |                                   |                                      |     |        |                |   |   |
|--------------------------|------|----------------------------------------------------------------------------------------------------------------------------------------------------------------------------------------------------------------------|-----------|-----------------------------------|--------------------------------------|-----|--------|----------------|---|---|
| Sternfeld, B., et al.    | 2014 | botanical formulation in reducing menopausal symptoms in otherwise healthy women." Efficacy of exercise for menopausal symptoms: a randomized controlled trial                                                       | Menopause | USA                               | peri and postmenopausal and surgical | 142 | 12 wks | exercise       | 5 | 6 |
| Stevenson, J. C., et al. | 2010 | Oral ultra-low dose continuous combined hormone replacement therapy with 0.5 mg 17beta-oestradiol and 2.5 mg dydrogesterone for the treatment of vasomotor symptoms: results from a double-blind, controlled study." | Maturitas | France, Poland, Romania, Russia   | postmenopausal                       | 313 | 13 wks | oral HRT       | 4 | 6 |
| Stovall, D., et al.      | 2007 | The effects of combined raloxifene and oral estrogen on vasomotor symptoms and endometrial safety                                                                                                                    | Menopause | USA                               | postmenopausal                       | 149 | 52 wks | SSRI           | 4 | 6 |
| Studd, J.                | 1999 | Efficacy and acceptability of intranasal 17 beta-oestradiol for menopausal symptoms: randomised dose-response study. Aerodiol Study Group                                                                            | Lancet    | Denmark, UK                       | postmenopausal                       | 420 | 12 wks | intranasal HRT | 5 | 4 |
| Studd, J., et al.        | 1995 | Efficacy and tolerance of Menorest compared to Premarin in the treatment of postmenopausal women. A randomised, multicentre, double-                                                                                 | Maturitas | UK, Italy, Australia, New Zealand | postmenopausal and surgical          | 214 | 12 wks | oral HRT       | 2 | 6 |

|                              |      |                                                                                                                                                                                      |                                                      |          |                             |      |        |                     |   |   |
|------------------------------|------|--------------------------------------------------------------------------------------------------------------------------------------------------------------------------------------|------------------------------------------------------|----------|-----------------------------|------|--------|---------------------|---|---|
| Sulak, P. J.                 | 1999 | blind, double-dummy study.<br>Efficacy and safety of a constant-estrogen, pulsed-progestin regimen in hormone replacement therapy                                                    | International Journal of Fertility & Womens Medicine | USA      | postmenopausal              | 1253 | 3 mos  | oral HRT            | 2 | 4 |
| Suvanto-Luukkonen, E., et al | 2005 | Citalopram and fluoxetine in the treatment of postmenopausal symptoms: a prospective, randomized, 9-month, placebo-controlled, double-blind study.                                   | Menopause                                            | Finland  | postmenopausal              | 150  | 9 mo   | SSRI                | 4 | 2 |
| Swanson, S. G., et al        | 2006 | "Tibolone for the treatment of moderate to severe vasomotor symptoms and genital atrophy in postmenopausal women: a multicenter, randomized, double-blind, placebo-controlled study. | Menopause                                            | USA      | postmenopausal              | 396  | 12 wks | tibolone            | 4 | 6 |
| Tanmahasamut, P.             | 2015 | Cimicifuga racemosa extract for relieving menopausal symptoms: a randomized controlled trial                                                                                         | Climacteric                                          | Thailand | peri and postmenopausal     | 54   | 12 wks | dietary supplements | 5 | 2 |
| Tice, J. A.                  | 2003 | Phytoestrogen supplements for the treatment of HF: the Isoflavone Clover Extract (ICE) Study: a randomized controlled trial                                                          | JAMA                                                 | USA      | postmenopausal and surgical | 252  | 12 wks | isoflavone          | 5 | 6 |
| Uebelhack, R.                | 2006 | Black cohosh and St. John's wort for                                                                                                                                                 | Obstetrics and Gynecology                            | Germany  | postmenopausal              | 206  | 16 wks | dietary supplements | 4 | 4 |

|                               |      |                                                                                                                                                                                                                                         |                                             |                          |                             |     |        |                     |   |   |
|-------------------------------|------|-----------------------------------------------------------------------------------------------------------------------------------------------------------------------------------------------------------------------------------------|---------------------------------------------|--------------------------|-----------------------------|-----|--------|---------------------|---|---|
| Utian, W. H., et al.          | 1999 | climacteric complaints: A randomized trial<br>Efficacy and safety of low, standard, and high dosages of an estradiol transdermal system (Esclim) compared with placebo on vasomotor symptoms in highly symptomatic menopausal patients. | American Journal of Obstetrics & Gynecology | USA                      | postmenopausal and surgical | 196 | 12 wks | oral HRT            | 4 | 2 |
| Utian, W., et al.             | 2004 | The Esclim Study Group<br>Relief of HF with new plant-derived 10-component synthetic conjugated estrogens.                                                                                                                              | Obstetrics and Gynecology                   | USA                      | postmenopausal and surgical | 281 | 12 wks | dietary supplements | 4 | 2 |
| Utian, W., et al.             | 2005 | Comparative controlled trial of a novel oral estrogen therapy, estradiol acetate, for relief of menopause symptoms.                                                                                                                     | Menopause                                   | USA                      | postmenopausal and surgical | 249 | 12 wks | oral HRT            | 4 | 6 |
| van der Sluijs, C. P., et al. | 2009 | A randomized placebo-controlled trial on the effectiveness of an herbal formula to alleviate menopausal vasomotor symptoms.                                                                                                             | Menopause                                   | Australis, Sydney        | postmenopausal              | 93  | 20 wks | dietary supplements | 1 | 6 |
| van Die, M. D.                | 2009 | Hypericum perforatum with Vitex agnus-castus in menopausal symptoms: a randomized, controlled trial                                                                                                                                     | Menopause                                   | Australia                | peri and postmenopausal     | 92  | 12 wks | dietary supplements | 5 | 6 |
| Van Patten, C. L., et al.     | 2002 | Effect of soy phytoestrogens on HF in postmenopausal women with breast cancer: a randomized, controlled clinical trial.                                                                                                                 | Journal of Clinical Oncology                | Canada, British Columbia | breast cancer               | 157 | 12 wks | isoflavone          | 4 | 6 |

|                         |      |                                                                                                                                                                                                        |                                     |               |                             |     |        |                     |   |   |
|-------------------------|------|--------------------------------------------------------------------------------------------------------------------------------------------------------------------------------------------------------|-------------------------------------|---------------|-----------------------------|-----|--------|---------------------|---|---|
| Verhoeven, M. O., et al | 2005 | Effect of a combination of isoflavones and Actaea racemosa Linnaeus on climacteric symptoms in healthy symptomatic perimenopausal women: a 12-week randomized, placebo-controlled, double-blind study. | Menopause                           | Netherlands   | perimenopausal              | 124 | 12 wks | isoflavone          | 5 | 6 |
| Villa, P.               | 2017 | The impact of combined nutraceutical supplementation on quality of life and metabolic changes during the menopausal transition: a pilot randomized trial                                               | Archives of Gynecology & Obstetrics | Italy         | perimenopausal              | 90  | 6 mos  | dietary supplements | 3 | 4 |
| Vincent, A.             | 2007 | Acupuncture for HF: a randomized, sham-controlled clinical study                                                                                                                                       | Menopause                           | USA           | peri and postmenopausal     | 103 | 12 wks | Antiepileptics      | 2 | 4 |
| von Hagens              | 2012 | Treating menopausal symptoms with a complex remedy or placebo: a randomized controlled trial                                                                                                           | Climacteric                         | Germany       | postmenopausal              | 102 | 12 wks | dietary supplements | 5 | 6 |
| von Holst, T.           | 2002 | Efficacy of a new 7-day transdermal sequential estradiol/levonorgestrel patch in women                                                                                                                 | Maturitas                           | Germany       | postmenopausal and surgical | 216 | 12 wks | transdermal HRT     | 4 | 4 |
| Walker, E. M., et al.   | 2010 | Acupuncture versus venlafaxine for the management of vasomotor symptoms in patients with hormone receptor-positive breast cancer: a randomized controlled trial                                        | Journal of Clinical Oncology        | USA, Michigan | breast cancer               | 50  | 12 wks | SSRI                | 2 | 3 |

|                       |      |                                                                                                                                                                                                                  |                    |                 |                             |     |        |                      |   |   |
|-----------------------|------|------------------------------------------------------------------------------------------------------------------------------------------------------------------------------------------------------------------|--------------------|-----------------|-----------------------------|-----|--------|----------------------|---|---|
| Wang, C. C.           | 2013 | A randomized, double-blind, multiple-dose escalation study of a Chinese herbal medicine preparation (Dang Gui Buxue Tang) for moderate to severe menopausal symptoms and quality of life in postmenopausal women | Menopause          | China           | postmenopausal              | 60  | 12 wks | dietary supplements  | 5 | 4 |
| Winther, K            | 2005 | Femal, a herbal remedy made from pollen extracts, reduces HF and improves quality of life in menopausal women: a randomized, placebo-controlled, parallel study                                                  | Climacteric        | Sweden          | postmenopausal              | 50  | 4 wks  | dietary supplements  | 5 | 6 |
| Wong, C.              | 2018 | Mindfulness-Based Stress Reduction (MBSR) or Psychoeducation for the Reduction of Menopausal Symptoms: A Randomized, Controlled Clinical Trial                                                                   | Scientific Reports | China, Hongkong | peri and postmenopausal     | 197 | 8 mos  | mindfulness training | 3 | 6 |
| Wuttke, W             | 2006 | Efficacy and tolerability of the Black cohosh (Actaea racemosa) ethanolic extract BNO 1055 on climacteric complaints: A double-blind, placebo- and conjugated estrogens-controlled study                         | Maturitas          | Czech           | postmenopausal              | 95  | 12 wks | dietary supplements  | 5 | 4 |
| Wyrwich, K. W., et al | 2008 | Identifying meaningful differences in vasomotor symptoms                                                                                                                                                         | Menopause          | US              | postmenopausal and surgical | 620 | 12 wks | SSRI                 | 5 | 6 |

|                 |      |                                                                                                                                                                                  |                                                           |                 |                         |     |        |                     |   |   |
|-----------------|------|----------------------------------------------------------------------------------------------------------------------------------------------------------------------------------|-----------------------------------------------------------|-----------------|-------------------------|-----|--------|---------------------|---|---|
| Xi, S.          | 2017 | among menopausal women<br>Effect of health education combining diet and exercise supervision in Chinese women with perimenopausal symptoms: a randomized controlled trial        | Climacteric                                               | China           | perimenopausal          | 60  | 12 wks | education           | 3 | 2 |
| Xia, Y., et al. | 2012 | A randomized double-blind placebo-controlled trial of a Chinese herbal medicine preparation (Jiawei Qing'e Fang) for HF and quality of life in perimenopausal women              | Menopause                                                 | China, Tianjin  | perimenopausal          | 72  | 12 wks | dietary supplements | 5 | 6 |
| Yang, H.,       | 2012 | Effect of combining therapy with traditional chinese medicine-based psychotherapy and herbal medicines in women with menopausal syndrome: a randomized controlled clinical trial | Evidence-Based Complementary & Alternative Medicine: eCAM | China           | postmenopausal          | 424 | 12 wks | dietary supplements | 5 | 6 |
| Zhong, L. L.    | 2013 | A randomized, double-blind, controlled trial of a Chinese herbal formula (Er-Xian decoction) for menopausal symptoms in Hong Kong perimenopausal women                           | Menopause                                                 | China, Hongkong | peri and postmenopausal | 108 | 12 wks | dietary supplements | 5 | 6 |

---
