# Supplementary material for: Variation in menopausal vasomotor symptoms outcomes in clinical trials: a systematic review
Source: PubMed Central journal article supplement (PMC6972542; doi:10.1111/1471-0528.15990), 2019-11-13
Supplement: BJO-127-320-s002.pdf [file BJO-127-320-s002.pdf]

**Table S2.** Vasomotor related outcomes measured by diary

| <b>Diary measures (as defined in each paper)</b>                    | <b>n</b> |
|---------------------------------------------------------------------|----------|
| Frequency of HF                                                     | 28       |
| Frequency of HF/NS                                                  | 19       |
| Frequency of moderate to severe HF                                  | 7        |
| Frequency of moderate to severe HF/NS                               | 4        |
| Number of HF                                                        | 28       |
| Number of HF/NS                                                     | 6        |
| Number of moderate to severe HF                                     | 9        |
| Number of moderate to severe HF/NS                                  | 10       |
| Severity of HF                                                      | 13       |
| Severity of HF/NS                                                   | 10       |
| Severity of moderate to severe HF                                   | 5        |
| Severity of moderate to severe HF/NS                                | 6        |
| Intensity of HF                                                     | 5        |
| Intensity of HF/NS                                                  | 2        |
| Incidence of HF                                                     | 1        |
| Bothersomeness of HF/NS                                             | 5        |
| HF (composite/severity) score                                       | 34       |
| A 40%-75% reduction in HF                                           | 8        |
| Frequency of awakenings resulting from nocturnal vasomotor symptoms | 1        |
| More than 50% patients halved the distress from HF/NS               | 1        |
| Moderate to severe rate of HF                                       | 1        |
| Percentage of HF reported                                           | 1        |
| Proportion of women responding to treatment                         | 1        |
| Number of Vasomotor complaints                                      | 1        |
| The percentage change in HF score                                   | 1        |

\* Expression of the primary outcomes as quoted in each study

Abbreviations: Hot flushes (HF), night sweats (NS)
