# Supplementary material for: Variation in menopausal vasomotor symptoms outcomes in clinical trials: a systematic review
Source: PubMed Central journal article supplement (PMC6972542; doi:10.1111/1471-0528.15990), 2019-11-13
Supplement: BJO-127-320-s003.pdf [file BJO-127-320-s003.pdf]

**Table S3.** Different definitions for frequency, severity, intensity and vasomotor scores of vasomotor related outcomes

| <b>Definitions</b>                                      | <b>n</b>   |
|---------------------------------------------------------|------------|
| <b>Frequency</b>                                        | <b>97</b>  |
| Defined as number                                       | 76         |
| Numeric visual scale from 0-10                          | 2          |
| Occurrence of HF                                        | 1          |
| Not defined                                             | 18         |
| <b>Severity</b>                                         | <b>111</b> |
| 4-point scale                                           | 70         |
| 5-point scale                                           | 21         |
| 7-point Likert scale                                    | 1          |
| Visual analog scale                                     | 5          |
| Defined as transient episodes of HF                     | 1          |
| Defined as four levels of HF severity from four domains | 1          |
| Defined as percentage of number of HF/NS decreased      | 1          |
| Severity "bubble" on a scale of 1 to 7                  | 1          |
| Defined as adding the duration and intensity score      | 1          |
| Not defined                                             | 9          |
| <b>Intensity</b>                                        | <b>28</b>  |
| Same as 4-point severity scale                          | 15         |
| Same as 5-point severity scale                          | 5          |
| Five-step self-rating scale                             | 1          |
| Defined as cumulative area under the curve of each HF   | 1          |
| Defined as 5-point scale bothersomeness of HF           | 1          |
| Total number of moderate or severe HF                   | 1          |
| Visual analog scale                                     | 1          |
| Not defined                                             | 3          |
| <b>HF composite/severity/intensity score</b>            | <b>68</b>  |
| HF severity score                                       | 27         |
| Moderate to severe HF severity score                    | 1          |
| Average of HF severity score                            | 14         |
| Average of moderate to severe HF severity score         | 6          |
| Daily average of HF severity score                      | 4          |
| Sum of HF severity score                                | 1          |
| Total number of HF multiplied by average severity       | 6          |
| Sum of all level of severity                            | 2          |
| Sum of the duration and intensity score                 | 1          |
| 5-point scale=severity                                  | 1          |
| 4-point verbal scale                                    | 1          |
| Not clear                                               | 3          |
| Not defined                                             | 1          |

- ♦ HF severity score=number of HF weighted by severity
- ♦ Moderate to severe HF severity score= number of moderate to severe HF weighted by severity
- ♦ Average of HF severity score=HF severity score divided by total number of HF
- ♦ Average of moderate to severe HF severity score= Moderate to severe HF severity score divided by total number of HF
- ♦ Average day of HF severity score=HF severity score divided by sum of day
- ♦ Sum of HF severity score=total number of HF weighted by severity

Abbreviations: Hot flushes (HF), night sweats (NS)
