# Supplementary material for: Variation in menopausal vasomotor symptoms outcomes in clinical trials: a systematic review
Source: PubMed Central journal article supplement (PMC6972542; doi:10.1111/1471-0528.15990), 2019-11-13
Supplement: BJO-127-320-s004.pdf [file BJO-127-320-s004.pdf]

## **Appendix S1. Search Strategy**

### **Cochrane Central Register of Controlled Trials**

- #1 MeSH descriptor: [Menopause] explode all trees (6786)
- #2 MeSH descriptor: [Climacteric] explode all trees (7012)
- #3 (menopaus\* or perimenopaus\* or postmenopaus\* or climacter\*):ti,ab (16690)
- #4 #1 or #2 or #3 (17709)
- #5 MeSH descriptor: [Hot Flashes] explode all trees (706)
- #6 (fl?sh\* or hot fl\*sh\* or sweat\* or night sweat\* or sleep hyperhidrosis or nocturnal diaphoresis):ti,ab (5415)
- #7 #5 or #6 (5588)
- #8 vasomotor:ti,ab (1327)
- #9 #4 and #7 and #8 (430)

### **Embase 1996 to 2018 Week 14**

- 1. exp menopause/ or exp menopause related disorder/ or exp "menopause and climacterium"/ (105520)
- 2. exp climacterium/ (5967)
- 3. (menopaus\* or perimenopaus\* or postmenopaus\* or climacter\*).tw. (99849)
- 4. 1 or 2 or 3 (129295)
- 5. exp hot flush/ (13499)
- 6. (fl?sh\* or hot fl\*sh\* or sweat\* or night sweat\* or sleep hyperhidrosis or nocturnal diaphoresis).tw. (69294)
- 7. 5 or 6 (77598)
- 8. vasomotor.tw. (9975)
- 9. 4 and 7 and 8 (1383)

### **Ovid MEDLINE(R) In-Process & Other Non-Indexed Citations and Ovid MEDLINE(R) 1946 to Present**

- 1. exp Menopause/ (52828)
- 2. exp CLIMACTERIC/ (55466)
- 3. (menopaus\* or perimenopaus\* or postmenopaus\* or climacter\*).tw (83563)
- 4. 1 or 2 or 3 (97576)
- 5. exp Hot Flashes/ (2892)
- 6. (fl?sh\* or hot fl\*sh\* or sweat\* or night sweat\* or sleep hyperhidrosis or nocturnal diaphoresis).tw. (67556)
- 7. 5 or 6 (68552)
- 8. vasomotor.tw. (11905)
- 9. 4 and 7 and 8 (1121)
